1 **An empirical test of the temperature dependence of carrying capacity**

2

3 Joey R. Bernhardt<sup>1\*</sup>, Jennifer M. Sunday<sup>1,2</sup>, and Mary I. O'Connor<sup>1</sup>

4

5 <sup>1</sup>Department of Zoology

6 Biodiversity Research Centre

7 University of British Columbia

8 Vancouver, BC, V6T 1Z4, Canada

9

10 <sup>2</sup> School of Marine and Environmental Affairs

11 University of Washington

12 Box 355685

13 Seattle, WA 98195-5685

14

15 \*Corresponding author: [joey.bernhardt@biodiversity.ubc.ca](mailto:joey.bernhardt@biodiversity.ubc.ca)

16

17 Keywords: metabolic scaling theory, photosynthesis, metabolism, temperature, carrying  
18 capacity, body size

19

20 Manuscript type: Article

21

22 Running head: Effects of temperature on abundance

23

24 Number of words (abstract): 226

25 Number of words (main body): 3937

26 Number of references: 40

27

28 **Abstract**

29 Predicting population persistence and dynamics in the context of global change is a major  
30 challenge for ecology. A widely held prediction is that population abundance at carrying capacity  
31 decreases with warming, assuming no change in resource supply, due to increased individual  
32 resource demands associated with higher metabolic rates. However, this prediction, which is  
33 based on metabolic scaling theory (MST), has not been tested empirically. Here we  
34 experimentally tested whether effects of temperature on short-term metabolic performance (rates  
35 of photosynthesis and respiration) translate directly to effects of temperature on population rates  
36 in a phytoplankton species. We found that effects of temperature on organismal metabolic rates  
37 matched theoretical predictions, and that the temperature dependence of individual metabolic  
38 performance translated to population abundance. Population abundance at carrying capacity,  $K$ ,  
39 decreased with temperature less than expected based on the temperature dependence of  
40 photosynthesis. Concurrent with declines in abundance, we observed a linear decline in cell size  
41 of approximately  $2.3\% \text{ } ^\circ\text{C}^{-1}$ , which is consistent with broadly observed patterns in unicellular  
42 organisms, known as the temperature-size rule. When theoretical predictions include higher  
43 densities allowed by shifts toward smaller individual size, observed declines in  $K$  were  
44 quantitatively consistent with theoretical predictions. Our results indicate that outcomes of  
45 population dynamics across a range of temperatures reflect organismal responses to temperature  
46 via metabolic scaling, providing a general basis for forecasting population responses to global  
47 change.

48

## 49 **Introduction**

50 Understanding population persistence and dynamics in a changing environment is a major  
51 challenge in ecology. Population dynamics reflect individual organisms' performance, which can  
52 change with temperature and affect demographic vital rates and ultimately population persistence  
53 (Fridley 2017). Despite substantial theoretical and empirical evidence linking temperature to one  
54 key demographic parameter - the intrinsic growth rate  $r$  - there has been little attention given to  
55 how changing temperature affects another central population parameter: density at steady state,  
56 or carrying capacity,  $K$  (Savage et al 2004, O'Connor et al. 2011, Gilbert et al. 2014). Carrying  
57 capacity of resource populations is central to understanding the structure of ecosystems and their  
58 stability (Rosenzweig 1971). In the absence of empirical evidence on the relationship between  
59 temperature and  $K$ , some models have assumed that  $K$  declines with increasing temperature  
60 proportionally to temperature-induced increases in per capita resource use (Allen et al. 2007,  
61 O'Connor et al. 2011, Gilbert et al. 2014). Yet different assumptions about how  $K$  changes with  
62 temperature have led to different predictions about the ecological outcomes of warming (e.g.  
63 Osmond et al. 2017 vs. Sentis et al. 2017). To date, we still lack an empirical test of whether  
64 population carrying capacity declines with temperature, and if so, if that decline should be  
65 predicted by temperature-driven change in per capita metabolic rate.

66

67 Carrying capacity,  $K$ , is the non-zero population abundance at which population growth is equal  
68 to zero.  $K$  is not merely a theoretical endpoint of the logistic model at stable equilibrium  
69 (Equation 1); it is one of two central parameters that describe temporal patterns in population  
70 abundance in many dynamic models. Although simple, the logistic growth model effectively  
71 describes population growth in microbial populations in simple environments, and underlies

72 more complex models. In the logistic growth model,

73

74 
$$\frac{dN}{dt} = rN \left(1 - \frac{N}{K}\right) \quad (1)$$

75

76  $N$  is the size of the population, and carrying capacity,  $K$ , is the value of  $N > 0$  that makes  $dN/dt = 0$

77 (Verhulst, 1838, Gotelli 1995).

78

79 A population's carrying capacity,  $K$ , is the outcome of density-dependent population growth

80 (Gause 1932, Gotelli 1995). The strength of density-dependence, or the effect of intraspecific

81 competition in limiting population growth at high densities, determines population abundance

82 when it is near  $K$ , and reflects the impact of density on per capita rates of resource use, birth and

83 death. These rates vary with the temperature dependence of metabolic rate in similar ways across

84 diverse taxa (Gillooly et al. 2001, Dell et al. 2011, Pawar et al. 2016). Metabolic scaling theory

85 (MST) has postulated that this variation is due to highly conserved, temperature-dependent rates

86 of aerobic respiration and oxygenic photosynthesis that underlie resource use, growth and

87 survival rates, lending some predictability to temperature effects on demographic processes

88 (Brown et al 2004, Savage et al 2004, O'Connor et al. 2011). Empirical evidence for the

89 temperature dependence of per capita rates and population growth rates supports MST

90 predictions (Eppley 1972, Ernest et al. 2003, Savage et al. 2004, López-Urrutia et al. 2006,

91 López-Urrutia 2008). Still, there is no evidence for how temperature dependence of per capita

92 performance affects density when density dependence is strong, near carrying capacity. Further,

93 no experiments have tested whether the macro-ecological relationships between the temperature

94 dependence of per capita photosynthetic or respiration rates and abundance at carrying capacity  
95 hold at the scale of a single population under controlled conditions. This is a major gap between  
96 the macro-ecology of metabolic scaling theory and the empirical patterns observed at the scale of  
97 warming experiments and study sites.

98

99 To solve this problem, we consider a general model for how metabolic thermal constraints  
100 translate to density dependence and abundance at carrying capacity (Savage et al. 2004). We  
101 estimate how per capita performance changes with temperature and whether that change directly  
102 predicts carrying capacity across a thermal gradient. We first test the hypothesis that the  
103 temperature dependence of per capita metabolic rate (oxygen flux) accurately predicts the  
104 decline in abundance with temperature. We then consider concurrent temperature-related shifts  
105 in phenotype, in particular, changes in body size consistent with the widely-observed  
106 temperature size-rule (Atkinson et al. 2003). We express these hypotheses and findings  
107 mathematically and integrate them into the Savage et al. (2004) model of how temperature  
108 dependence of metabolism scales to population vital rates.

109

## 110 **Methods**

111 To address these questions, we express our empirically testable hypotheses in terms of the  
112 Savage et al. (2004) model, which links the temperature dependence of metabolism to classic  
113 population growth model parameters ( $r$ ,  $K$ ). The Savage et al. (2004) model is centered on the  
114 allocation of energetic resources to processes that affect demography: survival, growth, and  
115 reproduction. We highlight the allocation assumptions here because they underlie our present  
116 approach. We describe how this theory can be tested empirically with independent measures of

117 metabolism and population dynamics and how this theory might be combined with the  
118 temperature-size rule (Atkinson et al. 2003, Forster et al. 2012) to predict changes in  $K$ . We then  
119 outline two resulting hypotheses that we test empirically with phytoplankton populations.

120

### 121 **Deriving experimentally testable hypotheses**

122 Populations can be maintained at steady state when individuals are reproducing and births  
123 balance deaths at the population level, maintaining constant density (births = deaths  $\neq 0$ ). Energy  
124 ( $E$ ) consumed by individuals must be allocated to producing new individuals and to maintenance.  
125 Following Savage et al. (2004), if  $E(M, T)$  is the mass- ( $M$ ) and temperature- ( $T$ ) dependent per  
126 capita energy required to produce a new individual, then it takes  $N(M, T, t)E(M, T)$  amount of  
127 energy to replace the entire population, where  $N(M, T, t)$  is the number of individuals at time  $t$ .  
128 At carrying capacity, on average  $N$  deaths will occur over a time period equal to the average  
129 lifespan,  $S(M, T)$ , and all individuals will be replaced over a time period equal to the average  
130 lifespan, so the energy needed to keep the population size at steady state is  $N(M, T, t)E(M, T)/$   
131  $S(M, T)$ . If we assume that energy required to produce a new individual ( $E(M)$ ) is linearly related  
132 to its mass, and independent of temperature (i.e. temperature may affect the rate of ontogenetic  
133 growth, but not the energy required to produce a new individual), then the total metabolic rate of  
134 the population ( $B_{pop}$ ) at steady state ( $N=K$ ) is

$$135 \quad B_{pop}(M, T) = K(M, T) \left[ B_i(M, T) + \frac{E(M)}{S(M, T)} \right] \quad (2)$$

136 where, after expansion, the first term is the energy required for maintenance and the second term,  
137  $K(M, T)E(M)/S(M, T)$ , is the energy required for replacement (i.e. production of one new  
138 individual per individual) and  $B_i(M, T)$  is individual metabolic rate. Assuming that total resource

139 use by the population equals total metabolic rate of the population, ( $B_{pop}$ ), then carrying capacity  
140 is achieved when the rate of resource supply,  $P$ , in the environment equals the rate of resource  
141 use by the population ( $B_{pop}$ ). If  $S(M, T) = S_0/B_i(M, T)$  (i.e., lifespan scales inversely with per  
142 capita metabolic rate, Gillooly et al. 2001) and we assume that  $E(M)/S(M, T) = (E_0/S_0)B_i(M, T)$   
143 then,

$$144 \quad B_{pop} = P = \left(1 + \frac{E_0}{S_0}\right) K(M, T) B_i(M, T) \quad (3)$$

145 where  $E_0$  and  $S_0$  are mass- and temperature-independent normalization constants,  $K(M, T)$  is  
146 population abundance at steady state, and  $B_i(M, T)$  is individual metabolic rate (Equation 11 in  
147 Savage et al. 2004).

148  
149 Equation 3 can be rearranged to show that, when resource supply ( $P$ ) is constant and independent  
150 of temperature, the temperature and mass dependences of  $K$  and  $B_i$  at steady-state must be  
151 inversely proportional, leading to the prediction that carrying capacity declines as individual  
152 metabolic rate increases with temperature (Equation 4). When individual metabolic rate,  $B_i$ ,  
153 scales with mass and temperature as  $B_i = M^{3/4} e^{-Ea/kT}$  (West et al. 1997, Gillooly et al. 2001), and  
154 if we assume for now that mass is independent of temperature, then  $K$  is predicted to decrease  
155 with increasing body size and decrease with increasing temperature (Savage et al. 2004; Figure  
156 2):

$$157 \quad K \propto M^{-\frac{3}{4}} e^{\frac{Ea}{kT}}. \quad (4)$$

158  
159 Therefore, a reasonable prediction for carrying capacity in warming environments is that it  
160 should decline with the slope of the inverse temperature dependence of per capita metabolic rate

161 (Savage et al. 2004, Vasseur and McCann 2005, O'Connor et al. 2011, Gilbert et al. 2014). This  
162 prediction assumes, however, that body size does not depend on temperature, so  $K$  scales simply  
163 as a function of the activation energy of metabolism (i.e.  $K$  is proportional to  $e^{Ea/kT}$ ). This  
164 simplifying assumption contradicts evidence for widely observed declines in body size  
165 associated with warming (Atkinson et al. 2003). Changing body sizes with warming could alter  
166 predictions of population density ( $K$ ) as a function of temperature. Incorporating temperature-  
167 dependent body size into expectations of population abundance, as we do next, may more closely  
168 link theory for temperature effects with observed changes in experiments and nature.

169

170 Following Osmond et al. 2017, we model the hypothesis that a temperature-induced decline in  $K$   
171 is modified by concomitant changes in body size by modifying Equation 4 to allow individual  
172 body mass to depend on temperature. We assume that  $M(T)$  declines linearly with temperature  
173 (consistent with the temperature-size rule in ectotherms, TSR),

$$174 \quad M(T) = M(T_{ref})[1 - \beta(T - T_{ref})] \quad (5)$$

175 where  $\beta$  is the fraction that mass is reduced as temperature is increased by one degree, and  $T_{ref}$   
176 is a reference temperature (here 5°C). This linear approximation of the TSR is appropriate for  
177 unicellular organisms such as phytoplankton (Atkinson et al. 2003, DeLong 2012, Forster et al.  
178 2012). If body mass decreases with temperature, then the negative temperature dependence of  $K$   
179 should be reduced relative to the case where body mass is temperature-invariant, because warmer  
180 conditions should support relatively more individuals of smaller size, thus reducing the negative  
181 temperature dependence of  $K$ . Alternatively, if body size does not change with temperature ( $\beta =$   
182 0), then the temperature dependence of  $K$  should be inversely proportional to the activation



183 energy of metabolism, as shown above (Equation 4).

184

185 Here, in a closed phytoplankton mesocosm system with a fixed, finite nutrient supply, we

186 experimentally tested the following two hypotheses:

187

188 *Hypothesis 1:* Carrying capacity declines with increasing temperature proportionally to the  
189 activation energy of per capita metabolic rate over a range of non-stressful temperatures. For  
190 primary producers, such as phytoplankton, the temperature dependence of  $K$  varies as a function  
191 of the activation energy of photosynthesis ( $E_a \approx 0.32$  eV) (Allen et al. 2005, Dewar 1999, Lopez-  
192 Urrutia 2006, 2008) and body mass at a reference temperature (Equation 4). At higher  
193 temperatures, per capita metabolic demand increases following a Boltzmann-Arrhenius  
194 relationship and causes carrying capacity,  $K$ , to decline. This relationship requires that total  
195 population level resource use does not increase such that the effect of temperature has the  
196 potential to translate to per capita resource limitation (Figure 1).

197

198 *Hypothesis 2:* Body mass decreases with temperature consistent following the temperature-size  
199 rule (Atkinson et al. 2003), reducing the effect of temperature on density at carrying capacity  
200 (Equation 5).

201

## 202 **Experimental Methods**

203 *Tetraselmis tetrahele* is a globally distributed coastal marine phytoplankton species. The cultured  
204 strain used here was obtained from the Canadian Centre for the Culture of Microorganisms  
205 (UW414), and was originally isolated off the coast of Vancouver Island, British Columbia,

206 Canada. *T. tetrahele* were maintained in laboratory culture in ESAW medium (Enriched  
207 Seawater, Artificial Water, Harrison et al. 1980) in 30 mL glass test tubes at 16°C for one year  
208 on a 16:8 light:dark cycle under nutrient and light saturated conditions before the start of the  
209 experiments. *T. tetrahele* is a flagellated chlorophyte that is fast-growing, eurythermal, highly  
210 motile, with a generation time of less than a day (Pena and Villegas 2005), making it a suitable  
211 species for mesocosm studies and tests of metabolic scaling theory.

212

### 213 **Estimating the activation energy of photosynthesis**

214 We determined the activation energy of photosynthesis over a temperature range from 8°C -  
215 24°C by measuring oxygen evolution in the light and oxygen consumption in the dark using a  
216 24-channel optical fluorescence oxygen system (Sensor Dish Reader SDR2, PreSens), equipped  
217 with a 24-chamber 200 uL glass microplate (Loligo Systems Aps, Tjele, Denmark). The reader  
218 was placed in a temperature-controlled incubator (Panasonic M1R-154) with light at 80  
219  $\mu\text{mol}/\text{m}^2/\text{s}$  over the course of the experiments. Prior to measurements of metabolic rates, 200 uL  
220 of well-mixed *T. tetrahele* cultures were transferred from 30 mL test tubes to each well on the  
221 microplate. Wells were sealed with transparent PCR film (Thermo Scientific, Waltham, MA,  
222 USA), and measurements of oxygen concentrations were taken every 15 seconds over three hour  
223 periods, first in darkness and next in light, using the SDR v4.0 software (PreSens, Germany).  
224 Prior to oxygen flux measurements, sensor spots were calibrated with air-saturated water and  
225 water containing 2% sodium sulfite at each experimental temperature. Phytoplankton cells were  
226 acclimated to the assay temperature for an hour in the dark prior to measurements. Six blank  
227 wells containing ESAW medium were run at the same time as the phytoplankton, and the

228 average rate of oxygen flux in these wells was subtracted from the experimental wells to account  
229 for background microbial respiration. Gross photosynthesis (GP) was estimated as GP = net  
230 photosynthesis + respiration at each temperature. We assumed that net photosynthesis is directly  
231 proportional to oxygen production in the light. We estimated per capita mass-normalized  
232 metabolic rates ( $B_i$ ) by dividing the total oxygen fluxes by the total population biovolume (mean  
233 cell volume \* cell density) from the source cultures measured using a FlowCAM (FlowCAM VS  
234 Series, Fluid Imaging Technologies) at a flow rate of 0.3 ml/min immediately before the  
235 respirometry experiments. The activation energies ( $E_a$ , Equation 4) of gross photosynthesis and  
236 respiration were estimated from relationships between log transformed mass-normalized oxygen  
237 flux rates and temperature ( $1/kT$ ) using OLS linear regression.

238

### 239 **Estimating the temperature dependence of carrying capacity**

240 We initiated five replicate experimental populations of *T. tetrahele* in 30 mL glass test tubes  
241 containing 25 mL of 10uM nitrate ESAW medium at a density of 2000 cells/mL at 5°C, 8°C,  
242 16°C, 25°C, 32°C, and 38°C. Nitrate concentrations in the medium were reduced (to 10uM)  
243 relative to other nutrients to ensure a controlled limiting nutrient at carrying capacity.  
244 Mesocosms were held at constant temperature and light conditions (16:8h light:dark cycle; 60  
245  $\mu\text{mol}/\text{m}^2/\text{s}$ ) until they reached steady state at all temperatures. Cell densities (cells/mL) and  
246 biovolumes ( $\mu\text{m}^3/\text{mL}$ ) were measured from 250  $\mu\text{L}$  samples every four days at the same time of  
247 day using the FlowCAM (flow rate 0.3 ml/min) for 43 days, until populations at all temperatures  
248 had reached carrying capacity (i.e. steady state).

249

250 To compare empirical observations with the predictions derived from Savage et al.'s framework  
251 (Equation 4), we estimated  $K$  in terms of number of individuals (individual cells/mL; units  
252 consistent with the units of the Savage model) and in terms of population biomass (approximated  
253 as total biovolume,  $\mu\text{m}^3/\text{mL}$ ). Population biomass is not explicitly modeled in Savage et al.  
254 (2004), and we add this measure here because it integrates population abundance and body size.  
255 We used a differential equation solver (*fitOdeModel* function with the 'PORT' algorithm in the  
256 *simecol* package in R) to fit a logistic growth model (Equation 1) to our time series population  
257 abundance data and estimated the parameters  $r$  and  $K$ . We set the initial phytoplankton  
258 abundance to our experimental starting conditions and examined model fits graphically by  
259 comparing simulated data using estimated parameters with the observed time series of population  
260 size. To test our prediction of the response of  $K$  across temperatures using the activation energy  
261 of photosynthesis in the increasing part of the thermal performance curve only (thus excluding  
262 thermally stressful conditions past the thermal optimum), we chose to restrict our analysis to  
263 temperatures up to and not exceeding the thermal optimum for intrinsic growth rates in *T.*  
264 *tetrahele* (Pawar et al. 2016).

265

266 To assess how population-level resource use varies with temperature, we created controlled  
267 resource conditions in the mesocosms. We reduced the concentration of nitrate in the medium by  
268 55-fold relative to complete ESAW medium to ensure that nitrate concentrations were limiting  
269 population densities at carrying capacity. We confirmed that populations were nitrate-limited by  
270 comparing abundances in populations at steady state when grown at higher nitrate levels in pilot  
271 studies prior to the experiment. We ensured that light was not limiting by observing no increase  
272 in abundance at higher light levels. To assess how population-level nitrate use at carrying

273 capacity changes with temperature, we measured the nitrate remaining in the mesocosm water  
274 columns at steady state.  
275  
276 At the end of the experiment, we measured chlorophyll-a concentration on a Turner Designs  
277 Trilogy fluorometer after filtration of 2mL samples of the experimental volume containing well-  
278 mixed phytoplankton onto GF/F filters, freezing the filters at -20°C and later extracting with  
279 90% acetone. We assayed nitrate concentrations spectrophotometrically from the filtrate using a  
280 cadmium reduction method (Strickland and Parsons 1968; LaMotte Nitrate Nitrogen Test Kit)  
281 with a Turner Designs Trilogy fluorometer (Nitrate/Nitrite Module (P/N: 7200-074)). We  
282 conducted all statistical analyses in R (version 3.4.1) (R Core Team 2017).

283

## 284 **Results**

285 *Hypothesis 1:* The activation energy of mass-normalized photosynthesis in *T. tetrahele* was 0.33  
286 eV (95% CI: 0.20, 0.46) (Figure 1). Including the 32°C and 38°C populations in the activation  
287 energy estimation introduced a non-linear decline in  $\ln K$ , consistent with the thermal optimum  
288 for *T. tetrahele* (approximately 28°C; *personal observations*), and therefore these populations  
289 were not included in the linear fit. At steady state, the natural log of population abundances  
290 (carrying capacity,  $\ln K$ ) decreased with increasing temperature at a rate of -0.18 eV (95% CI: -  
291 0.24, -0.12) (Figure 2). This corresponds to a temperature dependence that is less than that  
292 expected under Hypothesis 1, which predicts a slope that is inversely proportional to the  
293 activation energy of photosynthesis (-0.33 eV, i.e. -0.18 eV > -0.33 eV). Population-level nitrate  
294 use at steady state did not change with temperature (slope = 0.055 eV, 95% CI: -0.29, 0.19)

295 (Figure 3A).

296

297 *Hypothesis 2:* Cell size decreased as temperature increased (slope =  $-17.34 \text{ um}^3/\text{C}$ , 95% CI -  
298 20.71, -13.99) (Figure 3B), which corresponds to  $\sim 2.3\%$  decrease in cell size per degree increase  
299 in temperature. When this observed decline in body size was included in the theoretical  
300 prediction for  $K$  (Equation 5), the predicted slope was  $-0.16 \text{ eV}$ , which was statistically  
301 indistinguishable from the empirical estimates of  $K$  ( $-0.18 \text{ eV}$ , 95% CI:  $-0.24, -0.12$ ; Figure 2).  
302 Consistent with these patterns of declines in final abundance and size with temperature, carrying  
303 capacity estimated as population biomass, which combines estimates of cell size and cell  
304 number, decreased with temperature with a slope of  $-0.33 \text{ eV}$  (95% CI:  $-0.37, -0.28$ ) over the  
305 range of temperatures from  $5^\circ\text{C} - 25^\circ\text{C}$  (Figure 3C). Population-level concentrations of  
306 chlorophyll-a also decreased with increasing temperature (slope =  $-0.67 \text{ eV}$ , 95% CI  $-0.81, -$   
307  $0.53$ ).

308

## 309 **Discussion**

310 Consistent with metabolic scaling theory and macro-ecological synthesis (Savage et al. 2004),  
311 we found that at the scale of single populations of *Tetraselmis tetrahele*, carrying capacity varies  
312 with the temperature dependence of photosynthesis and the temperature dependence of body  
313 size. We observed a linear decline in cell size of approximately  $2.3\%^\circ\text{C}^{-1}$ , which is consistent  
314 with broadly observed patterns in unicellular organisms (Forster et al. 2012). While  $K$  declined  
315 with warming, the concomitant reduction in body size meant that  $K$  did not decline by nearly as  
316 much as would have been predicted by MST when assuming a temperature-invariant body size.

317 Body size shifts consistent with the TSR effectively compensated for declines in density that  
318 were expected based on metabolic demand.

319

320 To our knowledge, this is the most direct evidence to date for the proposed links between  
321 population abundance at carrying capacity, body size and empirically derived estimates of  
322 metabolic rate activation energies, thus providing a robust test of metabolic scaling theory at the  
323 population level. The estimated activation energy of photosynthesis in this study, 0.33 eV, is  
324 consistent with previously published estimates of the activation energy of photosynthesis in  
325 phytoplankton (López-Urrutia et al. 2006, Regaudie-de-Gioux and Duarte 2012, Padfield et al.  
326 2016). Carrying capacity results here are qualitatively consistent with other studies that have  
327 found similar negative temperature dependence of carrying capacity (Alto and Juliano 2001,  
328 West and Post 2016), although the link between per capita metabolic rate and density was  
329 previously assumed rather than measured.

330

331 Carrying capacity declined more rapidly than expected at temperatures exceeding the thermal  
332 optimum in this species (i.e. the 32°C and 38°C populations). This decline is consistent with  
333 dominance of physiological stress responses to temperature as it rises past the thermal optimum.  
334 When abundance declines due to physiological stress associated with warming, ecological  
335 opportunities for invasion, species turnover, or adaptation are expected to occur and shift  
336 community function (Sorte et al. 2010).

337

338 Fundamental constraints on metabolism are reflected in the scaling of population density with  
339 body size and temperature (Enquist et al. 1998, Savage et al. 2004). The relationship between

340 carrying capacity and temperature depends on how population-level resource use changes with  
341 temperature. Here we observed that population-level resource use (measured as nitrate remaining  
342 in the mesocosms at steady state) was the same across all temperatures, despite higher standing  
343 biomass and larger cell sizes in the cold. This suggests that under cold conditions, *T. Tetrahele* is  
344 more efficient at converting the limiting nutrient into biomass. In marine phytoplankton, nutrient  
345 uptake and conversion efficiency are strongly dependent on cell size. Maximum nutrient uptake  
346 rates increase isometrically with cell size (Marañón et al. 2013), while minimum nitrogen  
347 requirements scale with negative allometry (i.e. scale with a slope of  $\sim 0.87$ ), meaning that larger  
348 cells are more mass-efficient at converting nutrients to biomass (Marañón et al. 2013). While  
349 nutrient uptake, use and efficiency are often dependent on cell size, limited empirical evidence  
350 suggests that per capita nitrate uptake rates are independent of temperature in at least one species  
351 of marine phytoplankton, *T. pseudonana* (Baker et al. 2016). Taken together, our observations  
352 are consistent with these patterns of increased nutrient use efficiency at larger cell sizes and  
353 suggest that populations of larger cells may be able to maintain higher population biomass under  
354 conditions of nutrient limitation.

355

356 Carrying capacity of primary producers is a central parameter used in consumer-resource  
357 models. To date, most studies of consumer-resource dynamics have assumed a negative  
358 temperature dependence of resource carrying capacity (O'Connor et al. 2011, Rall et al. 2012,  
359 Gilbert et al. 2014). Where nutrient supply is consistent across temperatures and the population is  
360 well mixed or highly mobile, ensuring equal access to resources, our observations of decreasing  
361 abundance with warming suggest that this is a valid qualitative assumption. However, more  
362 empirical work would help to justify its general use, given that at least one other study (DeLong



363 and Hanson 2011) found a contrasting result. Our results further show that including the scaling  
364 of body size with temperature – even using the average response of approximately 2% decline  
365 per degree C– may generally improve accuracy.

366

367 Relating our findings to the patterns seen in other laboratory and field observations investigating  
368 population abundance as a function of temperature is not straightforward because most  
369 experiments have not explicitly fixed resource supply across temperature treatments. As a result,  
370 abundance changes with temperature are somewhat difficult to interpret in terms of energy-based  
371 predictions, and observed relationships have been increasing, decreasing, or unimodal in  
372 previous studies in which resource supply was not controlled (Fox and Morin 2001, Jiang and  
373 Morin 2004, Isaac et al. 2011).

374

375 Here we showed that carrying capacity and body size of photosynthetic autotrophs decline with  
376 increasing temperature, demonstrating a clear link between the kinetics of organismal metabolic  
377 rate and a key demographic parameter,  $K$ . We extended predictions of MST to include  
378 predictions that account for concomitant changes in body size with temperature – the  
379 temperature-size rule. We found that the temperature dependence of population abundance at  
380 steady state can be predicted based on changes in individual resource demand and body size with  
381 warming, thus demonstrating a metabolic basis of population dynamics. This work reinforces the  
382 framework of metabolic scaling of temperature dependence from subcellular processes to  
383 ecosystem processes, via population dynamics, for understanding cross-scale consequences of  
384 temperature in ecological systems.

385

386 **Acknowledgements**

387 We thank J. Yangel and W. Ou for help with lab experiments. We're grateful to M. Tseng, N.  
388 Knight, M. Siegle, N. Caulk and other members of the O'Connor Lab for many useful  
389 discussions about carrying capacity; and M. Osmond for feedback on the manuscript. Funding  
390 was provided by a Vanier Canada Graduate Scholarship (J.R.B), Natural Sciences and  
391 Engineering Research Council (M.M.O) and the Biodiversity Research Centre (J.M.S).

392

393 **Data accessibility:** All data will be made available on Dryad should the manuscript be accepted.

394

395 **Author contributions:** JRB conceived and designed the study, along with help from MMO and  
396 JMS. JRB carried out the experiments, analyzed the data and wrote the manuscript. All authors  
397 contributed to writing the manuscript.

398 **References**

399

- 400 Allen, A. P., J. F. Gillooly, and J. H. Brown. 2007. Recasting the species–energy hypothesis: the  
401 different roles of kinetic and potential energy in regulating biodiversity. Pages 283–299 in  
402 D. Storch, P. Marquet, and J. Brown, editors. *Scaling Biodiversity*. Cambridge University  
403 Press, Cambridge.
- 404 Allen, A. P., J. F. Gillooly, and J. H. Brown. 2005. Linking the global carbon cycle to individual  
405 metabolism. *Functional Ecology* 19:202–213.
- 406 Alto, B. W., and S. A. Juliano. 2001. Temperature Effects on the Dynamics of *Aedes albopictus*  
407 (Diptera: Culicidae) Populations in the Laboratory. *Journal of Medical Entomology* 38:548–  
408 556.
- 409 Atkinson, D., Ciotti, B.J. and Montagnes, D.J., 2003. Protists decrease in size linearly with  
410 temperature: ca. 2.5% C<sup>-1</sup>. *Proceedings of the Royal Society of London B: Biological*  
411 *Sciences*, 270(1533):2605-2611.
- 412 Baker, K. G., C. M. Robinson, D. T. Radford, A. S. McInnes, C. Evenhuis, and M. A. Doblin.  
413 2016. Thermal Performance Curves of Functional Traits Aid Understanding of Thermally  
414 Induced Changes in Diatom-Mediated Biogeochemical Fluxes. *Frontiers in Marine Science*  
415 3:44.
- 416 Dell, A. I., S. Pawar, and V. M. Savage. 2011. Systematic variation in the temperature  
417 dependence of physiological and ecological traits. *Proceedings of the National Academy of*  
418 *Sciences* 108:10591–10596.
- 419 DeLong, J. P. 2012. Experimental demonstration of a “rate-size” trade-off governing body size  
420 optimization. *Evolutionary Ecology Research* 14:343–352.
- 421 DeLong, J. P., and D. T. Hanson. 2011. Warming alters density dependence, energetic fluxes,  
422 and population size in a model algae. *Ecological Complexity* 8:320–325.
- 423 Enquist, B. J., J. H. Brown, and G. B. West. 1998. Allometric scaling of plant energetics and  
424 population density. *Nature* 395:163–165.
- 425 Eppley, R. W. 1972. Temperature and phytoplankton growth in the sea. *Fish. Bull* 70:1063–  
426 1085.
- 427 Ernest, S. K. M., B. J. Enquist, J. H. Brown, E. L. Charnov, J. F. Gillooly, V. M. Savage, E. P.  
428 White, F. A. Smith, E. A. Hadly, J. P. Haskell, S. K. Lyons, B. A. Maurer, K. J. Niklas, and  
429 B. Tiffney. 2003. Thermodynamic and metabolic effects on the scaling of production and  
430 population energy use. *Ecology Letters* 6:990–995.
- 431 Forster, J., A. G. Hirst, and D. Atkinson. 2012. Warming-induced reductions in body size are  
432 greater in aquatic than terrestrial species. *Proceedings of the National Academy of Sciences*  
433 *of the United States of America* 109:19310–4.
- 434 Fox, J. W. and P.J. Morin. 2001. Effects of intra-and interspecific interactions on species  
435 responses to environmental change. *Journal of Animal Ecology* 70:80–90.
- 436 Fridley, J. D. 2017. Plant energetics and the synthesis of population and ecosystem ecology.  
437 *Journal of Ecology* 105:95–110.
- 438 Gause, G. F. 1932. Experimental Studies On The Struggle For Existence. *Journal of*  
439 *Experimental Biology*, 9(4):389-402.
- 440 Gilbert, B., T. D. Tunney, K. S. Mccann, J. P. Delong, D. A. Vasseur, V. Savage, J. B. Shurin, A.  
441 I. Dell, B. T. Barton, C. D. G. Harley, H. M. Kharouba, P. Kratina, J. L. Blanchard, C.  
442 Clements, M. Winder, H. S. Greig, and M. I. O’Connor. 2014. A bioenergetic framework

- 443 for the temperature dependence of trophic interactions. *Ecology Letters* 17:902–914.
- 444 Gillooly, J. F., J. H. Brown, G. B. West, V. M. Savage, and E. L. Charnov. 2001. Effects of size  
445 and temperature on metabolic rate. *Science* 293:2248–2251.
- 446 Gotelli, N.J., 1995. *A primer of ecology*. Sinauer Associates Incorporated.
- 447 Harrison, P. J., R. E. Waters, and F. J. R. Taylor. 1980. A broad spectrum artificial sea water  
448 medium for coastal and open ocean phytoplankton. *Journal of Phycology* 16:28–35.
- 449 Isaac, N. J. B., M. Girardello, T. M. Brereton, and D. B. Roy. 2011. Butterfly abundance in a  
450 warming climate: patterns in space and time are not congruent. *Journal of Insect*  
451 *Conservation* 15:233–240.
- 452 Jiang, L., and P. J. Morin. 2004. Temperature-dependent interactions explain unexpected  
453 responses to environmental warming in communities of competitors. *Journal of Animal*  
454 *Ecology* 73:569–576.
- 455 López-Urrutia, Á. 2008. The metabolic theory of ecology and algal bloom formation. *Limnology*  
456 *and Oceanography* 53:2046–2047.
- 457 López-Urrutia, A., E. San Martin, R. P. Harris, and X. Irigoien. 2006. Scaling the metabolic  
458 balance of the oceans. *Proceedings of the National Academy of Sciences of the United*  
459 *States of America* 103:8739–44.
- 460 Marañón, E., P. Cermeño, D. C. López-Sandoval, T. Rodríguez-Ramos, C. Sobrino, M. Huete-  
461 Ortega, J. M. Blanco, and J. Rodríguez. 2013. Unimodal size scaling of phytoplankton  
462 growth and the size dependence of nutrient uptake and use. *Ecology Letters* 16:371–379.
- 463 O’Connor, M. I., B. Gilbert, and C. J. Brown. 2011. Theoretical predictions for how temperature  
464 affects the dynamics of interacting herbivores and plants. *The American Naturalist*  
465 178:626–38.
- 466 Osmond, M. M., M. A. Barbour, J. R. Bernhardt, M. W. Pennell, J. M. Sunday, and M. I.  
467 O’Connor. 2017. Warming-Induced Changes to Body Size Stabilize Consumer-Resource  
468 Dynamics. *The American Naturalist* 189:0.
- 469 Padfield, D., G. Yvon-Durocher, A. Buckling, S. Jennings, and G. Yvon-Durocher. 2016. Rapid  
470 evolution of metabolic traits explains thermal adaptation in phytoplankton. *Ecology Letters*  
471 19:133–142.
- 472 Pawar, S., A. I. Dell, V. M. Savage, J. L. Knies, M. Kearney, and S. Kalisz. 2016. Real versus  
473 artificial variation in the thermal sensitivity of biological traits. *The American Naturalist*  
474 187:E41–E52.
- 475 Pena, M. R., and C. T. Villegas. 2005. Cell growth, effect of filtrate and nutritive value of the  
476 tropical Prasinophyte *Tetraselmis tetraele* (Butcher) at different phases of culture.  
477 *Aquaculture Research* 36:1500–1508.
- 478 Rall, B. C., U. Brose, M. Hartvig, G. Kalinkat, F. Schwarzmüller, O. Vucic-Pestic, and O. L.  
479 Petchey. 2012. Universal temperature and body-mass scaling of feeding rates. *Philosophical*  
480 *transactions of the Royal Society of London. Series B, Biological Sciences* 367:2923–34.
- 481 Regaudie-de-Gioux, A., and C. M. Duarte. 2012. Temperature dependence of planktonic  
482 metabolism in the ocean. *Global Biogeochemical Cycles* 26.
- 483 Rosenzweig, M. L. 1971. Paradox of Enrichment: Destabilization of Exploitation Ecosystems in  
484 Ecological Time. *Science* 171:385–387.
- 485 Savage, V. M., J. F. Gillooly, J. H. Brown, G. B. West, and E. L. Charnov. 2004. Effects of Body  
486 Size and Temperature on Population Growth. *The American Naturalist* 163:429–441.
- 487 Sentis, A., A. Binzer, and D. S. Boukal. 2017. Temperature-size responses alter food chain

488 persistence across environmental gradients. *Ecology Letters* 20:852–862.  
489 Sorte, C. J. B., A. Fuller, and M. E. S. Bracken. 2010. Impacts of a simulated heat wave on  
490 composition of a marine community. *Oikos* 119:1909–1918.  
491 Strickland, J. D., and T. R. Parsons. 1968. J. D. H. Strickland and T. R. Parsons: A Practical  
492 Handbook of Seawater Analysis. Ottawa: Fisheries Research Board of Canada, Bulletin  
493 167, 1968. 293 pp.  
494 Vasseur, D. A., and K. S. McCann. 2005. A Mechanistic Approach for Modeling Temperature-  
495 Dependent Consumer-Resource Dynamics. *The American Naturalist* 166:184–198.  
496 Verhulst, P.F., 1838. Notice sur la loi que la population suit dans son accroissement.  
497 correspondance mathématique et physique publiée par a. *Quetelet*, 10, pp.113-121.  
498 West, D. C., and D. M. Post. 2016. Impacts of warming revealed by linking resource growth  
499 rates with consumer functional responses. *Journal of Animal Ecology* 85:671–680.  
500 West, G. B., J. H. Brown, and B. J. Enquist. 1997. A general model for the origin of allometric  
501 scaling laws in biology. *Science* 276:122–126.  
502

503  
504  
505  
506

## Figures

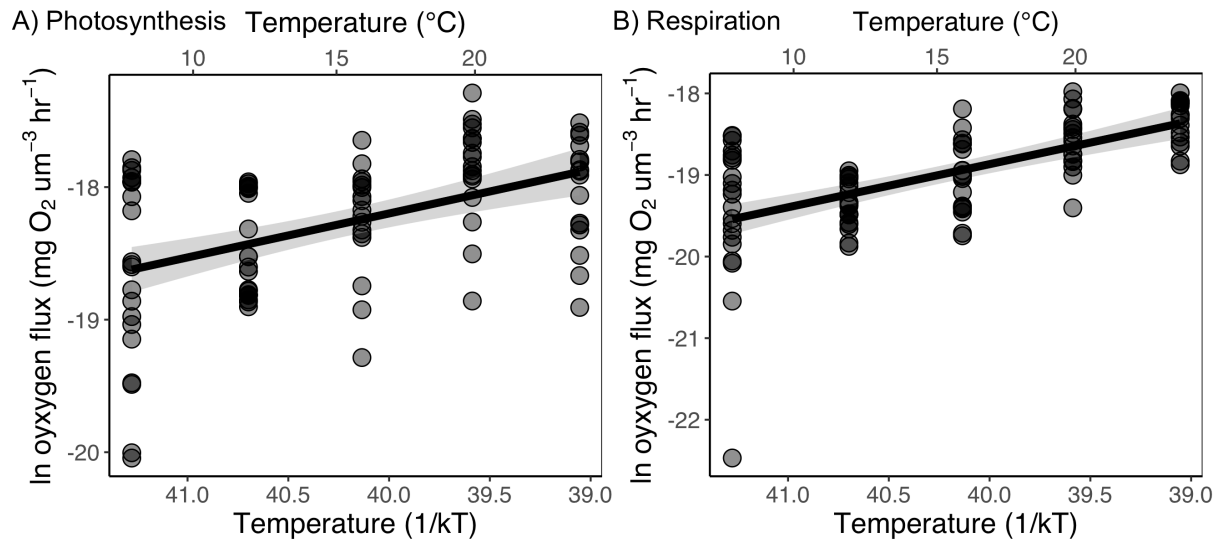

507

508 Figure 1. Mass-normalized metabolic rates of *T. tetrahele* increase with temperature. Estimated  
509 activation energies are for gross photosynthesis  $E_a = 0.33$  (95% CI: 0.28, 0.37) (A), and for  
510 respiration,  $E_a = 0.53$  (95% CI: 0.39, 0.67) (B). Points are shown at medium opacity to indicate  
511 overlap.

512

513

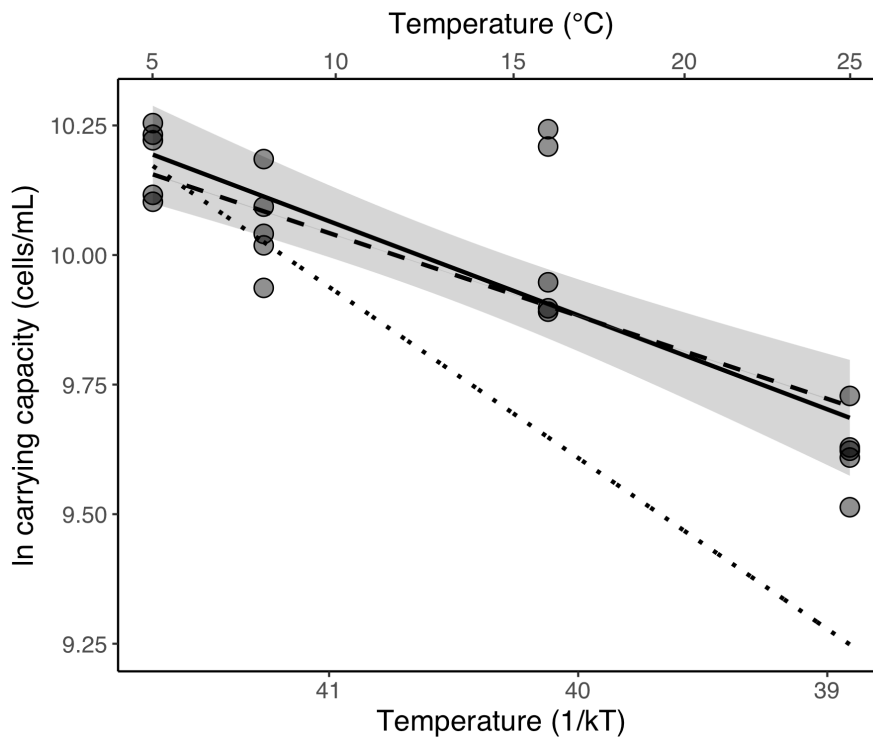

514

515 Figure 2. Carrying capacity decreases with temperature, with a slope of  $-0.18$  eV (95% CI:  $-0.24$ ,

516  $-0.12$ ). Dotted line corresponds to the predictions of Savage et al. (2004), with a temperature-

517 independent body mass. Thick dashed line corresponds to predicted carrying capacity, with a

518 temperature-dependent body mass. Solid line corresponds to the linear model fit to data.

519

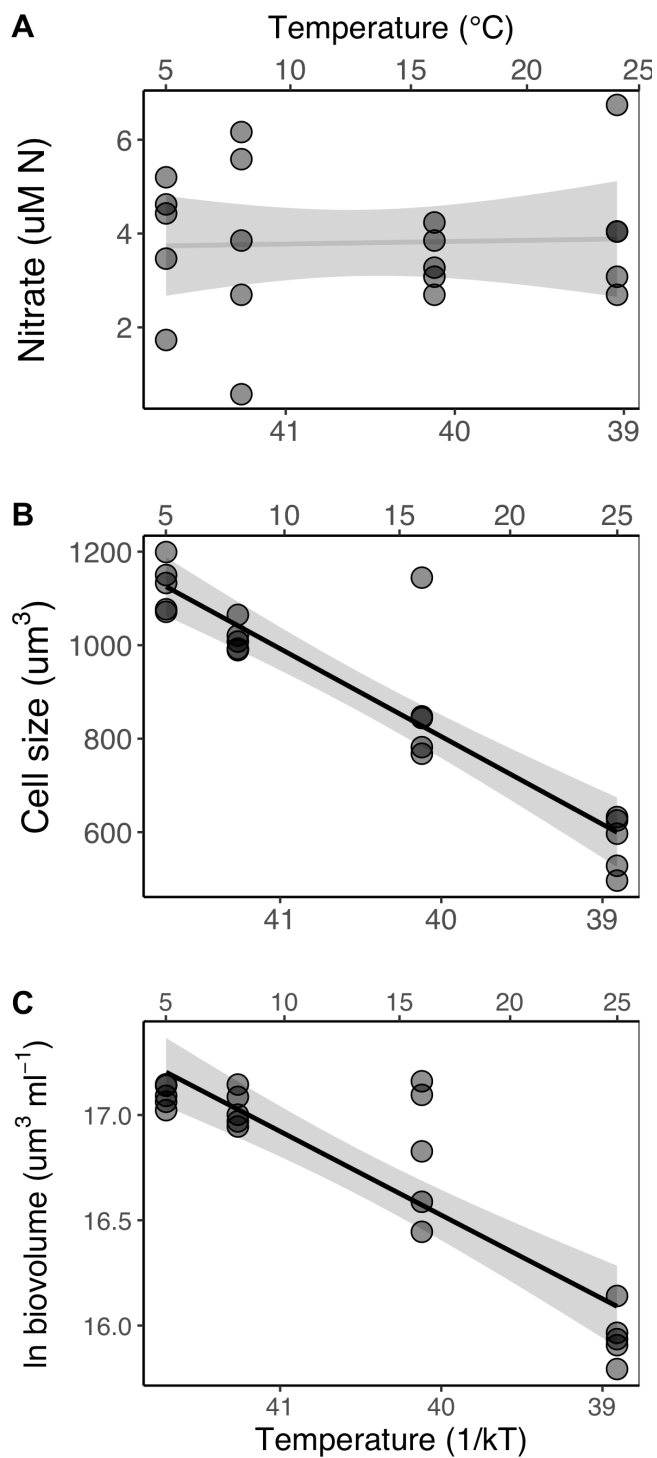

520

521 Figure 3. Water column total nitrate (A), average cell size (B) and total population biovolume

522 (C) at steady state (after 43 days of growth).
